# Supplementary material for: Differences Due to Sex and Sweetener on the Bioavailability of (Poly)phenols in Urine Samples: A Machine Learning Approach
Source: MDPI journal article supplement (doi:10.3390/metabo13050653), 2023-05-11
Supplement: s1 [file s1]

# Supplementary material for “Differences due to sex and sweetener on the bioavailability of (poly)phenols in urine samples: a machine learning approach”

Diego Hernández-Prieto <sup>1</sup>, Alberto Garre <sup>2,3</sup>, Vicente Agulló <sup>4</sup>, Cristina García-Viguera <sup>1,3,\*</sup> and Jose A. Egea<sup>5</sup>

<sup>1</sup> Lab Fitoquímica y Alimentos Saludables (LabFAS), Department of Food Science and Technology (CEBAS-CSIC), Campus Universitario Espinardo 25, 30100 Murcia, Spain

<sup>2</sup> Agronomic Engineering Department, Universidad Politécnica de Cartagena (UPCT), Paseo Alfonso XIII, 48, 30203 Cartagena, Spain

<sup>3</sup> Associated Unit of R&D and Innovation CEBAS-CSIC+UPCT on “Quality and Risk Assessment of Foods”, CEBAS-CSIC, Campus Universitario de Espinardo 25, 30100 Murcia, Spain

<sup>4</sup> Human Nutrition Unit, Department of Food & Drug, University of Parma, 43125 Parma, Italy.

<sup>5</sup> Group of Fruit Breeding, Department of Plant Breeding, CEBAS-CSIC, Campus Universitario de Espinardo 25, 30100 Murcia, Spain

\* Correspondence: cgviguera@cebas.csic.es

## Table of contents

|                                                                                                                                                                          |    |
|--------------------------------------------------------------------------------------------------------------------------------------------------------------------------|----|
| Table S1. List of flavonoids present in the beverages .....                                                                                                              | 2  |
| Anthocyanins in decreasing concentration order .....                                                                                                                     | 2  |
| Flavanones in decreasing concentration order .....                                                                                                                       | 2  |
| Table S2. Descriptive statistics .....                                                                                                                                   | 3  |
| Metabolites derived exclusively from flavanones .....                                                                                                                    | 3  |
| Metabolites derived from (poly)phenols .....                                                                                                                             | 4  |
| Table S3. Pairwise T-test results from (poly)phenol metabolites .....                                                                                                    | 5  |
| Table S4. Pairwise T-test results from flavanone metabolites .....                                                                                                       | 7  |
| Table S5. Distribution of values of metabolites concentrations from different families at different sampling times: .....                                                | 10 |
| Table S6. (Poly)phenol metabolites concentration values and more information about the volunteer 66, who was assigned a cluster by the clustering with no one else ..... | 20 |
| Figure S1. Zoom on CA-GS clusters analyses results .....                                                                                                                 | 21 |

Table S1. List of flavonoids present in the beverages

Anthocyanins in decreasing concentration order

Glucoside (glc), sambubioside (sam), rutinoside (rut),

| <b>Compound</b>                               | <b>Concentration (mg/100 mL)</b> |
|-----------------------------------------------|----------------------------------|
| Delphinidin 3,5- <i>O</i> -di-glc             | 5.09                             |
| Delphinidin 3- <i>O</i> -sam-5- <i>O</i> -glc | 4.48                             |
| Delphinidin 3- <i>O</i> -glc                  | 4.48                             |
| Cyanidin 3- <i>O</i> -sam-5- <i>O</i> -glc    | 2.09                             |
| Cyanidin 3,5- <i>O</i> -di-glc                | 2.09                             |
| Delphinidin 3- <i>O</i> -sam                  | 1.51                             |
| Cyanidin 3- <i>O</i> -glc                     | 0.81                             |
| Cyanidin 3- <i>O</i> -sam                     | 0.51                             |

Flavanones in decreasing concentration order

| <b>Compound</b>                           | <b>Concentration (mg/100 mL)</b> |
|-------------------------------------------|----------------------------------|
| Hesperidin (hesperetin 7- <i>O</i> -rut)  | 9.11                             |
| Eriocitrin (eriodictyol 7- <i>O</i> -rut) | 1.91                             |
| Narirutin (naringenin 7- <i>O</i> -rut)   | 1.73                             |
| <i>O</i> -tri-glycosyl-naringenin         | 0.19                             |

Table S2. Descriptive statistics

Metabolites derived exclusively from flavanones

Eriodictyol (E), E-Glucuronide (EG), E-Sulfate (ES), total amount of E and its derivatives (Total E), Homoe-riodictyol (HE), HE-Glucuronide (HE-G), HE-Di-Glucuronide (HE-GG), total amount of HE and its derivatives (Total HE), Naringenin-Glucuronide (NG), Naringenin-Sulfate (NS), total amount of Naringenin (Total N)

|                 | Minimum | Q1         | Mean       | Trimmed Mean | Median     | Mode       | Variance   | Deviation  | Q3         | Maximum | Symmetry    | Kurtosis   |
|-----------------|---------|------------|------------|--------------|------------|------------|------------|------------|------------|---------|-------------|------------|
| <b>E</b>        | 0       | 0.04056325 | 0.08935155 | 0.08086382   | 0.06506279 | 0.07379087 | 0.00915952 | 0.09570537 | 0.10483815 | 1       | 5.20049085  | 40.1483766 |
| <b>EG.1</b>     | 0       | 0.00553683 | 0.03573123 | 0.02769077   | 0.01568355 | 0.00625348 | 0.00590074 | 0.07681626 | 0.04030376 | 1       | 8.58795341  | 98.449276  |
| <b>E.S</b>      | 0       | 0.06106193 | 0.15026867 | 0.13552852   | 0.10423892 | 0.10512323 | 0.02511006 | 0.15846155 | 0.18598444 | 1       | 2.8836635   | 10.2322217 |
| <b>Total.E</b>  | 0       | 0.00565243 | 0.03616739 | 0.02813268   | 0.01609088 | 0          | 0.00590199 | 0.0768244  | 0.04080619 | 1       | 8.57549361  | 98.233469  |
| <b>HE</b>       | 0       | 0.56168122 | 0.59967686 | 0.60506954   | 0.62117904 | 0.66593886 | 0.01448162 | 0.12033959 | 0.66593886 | 1       | -1.60615983 | 6.09156837 |
| <b>HE.G</b>     | 0       | 0.00179312 | 0.0383656  | 0.02871144   | 0.00622817 | 0.008494   | 0.00871553 | 0.093357   | 0.02364356 | 1       | 5.61900805  | 45.9934719 |
| <b>HE.GG</b>    | 0       | 0.71535326 | 0.75508696 | 0.76466021   | 0.78396739 | 0.82065217 | 0.01949486 | 0.13962399 | 0.83627717 | 1       | -2.31362027 | 7.4725663  |
| <b>Total.HE</b> | 0       | 0.00318012 | 0.03985776 | 0.03021819   | 0.00736134 | 0.00266597 | 0.00871123 | 0.09333395 | 0.02567493 | 1       | 5.60248573  | 45.760395  |
| <b>N</b>        | 0       | 0.01367548 | 0.04460892 | 0.03819554   | 0.02690877 | 0.02904509 | 0.00527926 | 0.07265851 | 0.04722334 | 1       | 9.39657463  | 117.233473 |
| <b>N.G</b>      | 0       | 0.01813239 | 0.06738374 | 0.05931254   | 0.03802517 | 0          | 0.00839378 | 0.09161757 | 0.08696305 | 1       | 5.09535352  | 42.5573071 |
| <b>N.GG</b>     | 0       | 0.00790832 | 0.03486689 | 0.02775062   | 0.01680831 | 0.01680831 | 0.0053774  | 0.07333075 | 0.03793561 | 1       | 9.61015401  | 118.511243 |
| <b>N.S</b>      | 0       | 0.03027544 | 0.09592629 | 0.08254661   | 0.05764904 | 0.05147347 | 0.01634186 | 0.12783527 | 0.11213664 | 1       | 3.94937443  | 20.4656351 |
| <b>Total.N</b>  | 0       | 0.0218553  | 0.07180752 | 0.06404426   | 0.04290314 | 0          | 0.00834264 | 0.09133803 | 0.09248485 | 1       | 5.00971909  | 41.9939841 |

## Metabolites derived from (poly)phenols

Caffeic Acid (CA), CA-G Glucuronide (CA-G), CA-Glucuronide-Sulfate (CA-GS), total amount of CA and its derivatives (Total CA), 3,4-Dihydroxyphenylacetic acid (DHPAA), DHPAA-Glucuronide (DHPAA-G), DHPAA-Glucuronide-Sulfate (DHPAA-GS), DHPAA-Di-Sulfate (DHPAA-SS), total amount of DHPAA and its derivatives (Total DHPAA), Trans Ferulic Acid- Glucuronide (TFA-G), Trans Ferulic Acid-Sulfate (TFA-S), total amount of TFA and its derivatives (Total TFA), Vanillic Acid (VA), VA-Di-Glucuronide (VA-GG) and VA-Di-Sulfate (VA-SS), VA-Glucuronide-Sulfate (VA-GS), total amount of VA and its derivatives (Total VA).

|             | Minimum | Q1         | Mean       | Trimmed Mean | Median     | Mode       | Variance   | Deviation  | Q3         | Maximum | Symmetry   | Kurtosis   |
|-------------|---------|------------|------------|--------------|------------|------------|------------|------------|------------|---------|------------|------------|
| CA          | 0       | 0.0159292  | 0.04314784 | 0.03575245   | 0.02654867 | 0.02558563 | 0.00562074 | 0.07497159 | 0.04385251 | 1       | 8.92511915 | 104.959374 |
| CA-G        | 0       | 0.0157282  | 0.07058736 | 0.05553775   | 0.03414912 | 0.00369949 | 0.01487555 | 0.12196535 | 0.08693796 | 1       | 5.03328626 | 29.5817371 |
| CA-GS       | 0       | 0.0587406  | 0.14275959 | 0.13345687   | 0.11265588 | 0.06817525 | 0.01551167 | 0.12454587 | 0.18150846 | 1       | 2.53668153 | 10.4350493 |
| Total CA    | 0       | 0.02178237 | 0.07106744 | 0.06271368   | 0.0426157  | 0.00449818 | 0.00883698 | 0.0940052  | 0.08375585 | 1       | 4.8269179  | 38.0213099 |
| DHPAA       | 0       | 0.05781866 | 0.16246957 | 0.15257918   | 0.12220762 | 0.12746386 | 0.02121625 | 0.145658   | 0.2217477  | 1       | 1.92787548 | 5.6724837  |
| DHPAA-G     | 0       | 0.02301587 | 0.05669927 | 0.05053278   | 0.04345238 | 0.0844367  | 0.00541502 | 0.07358679 | 0.06944444 | 1       | 8.72562466 | 105.818761 |
| DHPAA-GS    | 0       | 0.03375734 | 0.08436188 | 0.07595087   | 0.05418941 | 0.03375734 | 0.00934302 | 0.09665929 | 0.09676589 | 1       | 4.44124344 | 32.4041848 |
| DHPAA-SS    | 0       | 0.00479124 | 0.02136391 | 0.01605516   | 0.00924025 | 0.00684463 | 0.00429104 | 0.06550607 | 0.01950719 | 1       | 13.3980016 | 196.345703 |
| Total DHPAA | 0       | 0.04356653 | 0.14002936 | 0.12489691   | 0.09240631 | 0.0870681  | 0.02587688 | 0.16086292 | 0.176226   | 1       | 2.75946122 | 9.47962219 |
| TFA-G       | 0       | 0.04440976 | 0.14111662 | 0.12600996   | 0.09314717 | 0.00075734 | 0.02586815 | 0.16083578 | 0.1769872  | 1       | 2.75679551 | 9.46443216 |
| TFA-S       | 0       | 0.01243105 | 0.0525921  | 0.04133032   | 0.02484545 | 0.0213858  | 0.00929922 | 0.09643248 | 0.05204879 | 1       | 5.71010241 | 43.3276199 |
| Total TFA   | 0       | 0.06714109 | 0.18145231 | 0.17047678   | 0.14356436 | 0.09742955 | 0.02543628 | 0.15948756 | 0.24752475 | 1       | 1.86667801 | 4.75314642 |
| VA          | 0       | 0.08139339 | 0.16916142 | 0.15913882   | 0.13259109 | 0.09483957 | 0.0192093  | 0.13859761 | 0.20175439 | 1       | 2.18467029 | 7.05770251 |
| VA-GS       | 0       | 0.02136991 | 0.0577446  | 0.05113761   | 0.04217992 | 0.03538273 | 0.00585312 | 0.07650571 | 0.07269504 | 1       | 7.9085561  | 90.4193506 |
| Total VA    | 0       | 0.02199914 | 0.06487771 | 0.05375034   | 0.03768678 | 0.02064076 | 0.00935345 | 0.09671321 | 0.07080559 | 1       | 5.56026622 | 41.2886263 |

Table S3. Pairwise T-test results from (poly)phenol metabolites

Male (M), female (F), Caffeic Acid (CA), CA-Glucuronide (CA-G), CA-Glucuronide-Sulfate (CA-GS), total amount of CA and its derivatives (Total CA), 3,4-Dihydroxyphenylacetic acid (DHPAA), DHPAA-Glucuronide (DHPAA-G), DHPAA-Glucuronide-Sulfate (DHPAA-GS), DHPAA-Di-Sulfate (DHPAA-SS), total amount of DHPAA and its derivatives (Total DHPAA), Trans Ferulic Acid-Glucuronide (TFA-G), Trans Ferulic Acid-Sulfate (TFA-S), total amount of TFA and its derivatives (Total TFA), Vanillic Acid (VA), VA-Di-Glucuronide (VA-GG) and VA-Di-Sulfate (VA-SS), VA-Glucuronide-Sulfate (VA-GS), total amount of VA and its derivatives (Total VA).

|     |              | Sweetener       |    |    |           |
|-----|--------------|-----------------|----|----|-----------|
|     |              | SA              | ST | SU | 1-way sex |
| Sex | caffeic acid |                 |    |    |           |
|     | M            |                 |    |    |           |
|     | F            | 0.03            |    |    | 0.015     |
|     |              | 1-way sweetener |    |    |           |

|     |         | Sweetener       |       |    |           |
|-----|---------|-----------------|-------|----|-----------|
|     |         | SA              | ST    | SU | 1-way sex |
| Sex | CA-Gluc |                 |       |    |           |
|     | M       |                 | 0.003 |    |           |
|     | F       |                 | 0.025 |    | 0.005     |
|     |         | 1-way sweetener | 0.002 |    | 0.003     |

|     |            | Sweetener       |    |    |           |
|-----|------------|-----------------|----|----|-----------|
|     |            | SA              | ST | SU | 1-way sex |
| Sex | DHPAA-Gluc |                 |    |    |           |
|     | M          |                 |    |    |           |
|     | F          |                 |    |    |           |
|     |            | 1-way sweetener |    |    |           |

|     |               | Sweetener       |    |    |           |
|-----|---------------|-----------------|----|----|-----------|
|     |               | SA              | ST | SU | 1-way sex |
| Sex | DHPAA-di-Gluc |                 |    |    |           |
|     | M             |                 |    |    |           |
|     | F             |                 |    |    |           |
|     |               | 1-way sweetener |    |    |           |

|                 |                 | Sweetener |    |    |           |
|-----------------|-----------------|-----------|----|----|-----------|
| Sex             | DHPAA-G-Sulfate |           |    |    | 1-way sex |
|                 | M               | SA        | ST | SU |           |
|                 | F               |           |    |    |           |
| 1-way sweetener |                 |           |    |    |           |

|                 |                  | Sweetener |    |    |           |
|-----------------|------------------|-----------|----|----|-----------|
| Sex             | DPHAA-di-Sulfate |           |    |    | 1-way sex |
|                 | M                | SA        | ST | SU |           |
|                 | F                |           |    |    |           |
| 1-way sweetener |                  |           |    |    |           |
|                 |                  |           |    |    | 0.049     |

|                 |             | Sweetener |    |      |           |
|-----------------|-------------|-----------|----|------|-----------|
| Sex             | TOTAL DHPAA |           |    |      | 1-way sex |
|                 | M           | SA        | ST | SU   |           |
|                 | F           |           |    |      |           |
| 1-way sweetener |             |           |    |      |           |
|                 |             |           |    | 0.02 | 0.043     |

Table S4. Pairwise T-test results from flavanone metabolites

Male (M), Female (H), Sucrose (SA), Sucralose (SU), Stevia (ST), Eriodictyol (E), E-Glucuronide (EG), E-Sulfate (ES), total amount of E and its derivatives (Total E), Homoe-riodyctiol (HE), HE-Glucuronide (HE-G), HE-Di-Glucuronide (HE-GG), total amount of HE and its derivatives (Total HE), Naringenin-Glucuronide (NG), Naringenin-Sulfate (NS), total amount of Naringenin (Total N)

|     |                 | Sweetener |    |    |           |
|-----|-----------------|-----------|----|----|-----------|
| Sex | Eriodictyol     | SA        | ST | SU | 1-way sex |
|     | M               |           |    |    |           |
|     | F               | 0.032     |    |    |           |
|     | 1-way sweetener | 0.008     |    |    |           |

|     |                 | Sweetener |    |    |           |
|-----|-----------------|-----------|----|----|-----------|
| Sex | EG              | SA        | ST | SU | 1-way sex |
|     | M               | 0.044     |    |    |           |
|     | F               |           |    |    |           |
|     | 1-way sweetener |           |    |    |           |

|     |                 | Sweetener |       |    |           |
|-----|-----------------|-----------|-------|----|-----------|
| Sex | ES              | SA        | ST    | SU | 1-way sex |
|     | M               |           |       |    |           |
|     | F               | 0.034     | 0.015 |    | 0.000632  |
|     | 1-way sweetener |           | 0.007 |    |           |

|     |                 | Sweetener |    |    |           |
|-----|-----------------|-----------|----|----|-----------|
| Sex | TOTAL E         | SA        | ST | SU | 1-way sex |
|     | M               | 0.043     |    |    |           |
|     | F               |           |    |    |           |
|     | 1-way sweetener |           |    |    |           |

|     |                 | Sweetener |    |       |           |
|-----|-----------------|-----------|----|-------|-----------|
| Sex | HE              | SA        | ST | SU    | 1-way sex |
|     | M               | 0.018     |    | 0.015 | 0.005     |
|     | F               |           |    |       |           |
|     | 1-way sweetener |           |    | 0.042 | 0.007     |

|  |  | Sweetener |  |  |  |
|--|--|-----------|--|--|--|
|--|--|-----------|--|--|--|

|     | HE-G            | SA    | ST       | SU | 1-way sex |
|-----|-----------------|-------|----------|----|-----------|
| Sex | M               | 0.016 | 0.016    |    | 0.000461  |
|     | F               |       | 0.003    |    |           |
|     | 1-way sweetener | 0.015 | 0.000235 |    | 0.001     |

|     |                 | Sweetener |    |    |           |
|-----|-----------------|-----------|----|----|-----------|
|     | HE-GG           | SA        | ST | SU | 1-way sex |
| Sex | M               |           |    |    | 0.041     |
|     | F               |           |    |    |           |
|     | 1-way sweetener |           |    |    | 0.008     |

|     |                 | Sweetener |          |       |           |
|-----|-----------------|-----------|----------|-------|-----------|
|     | TOTAL HE        | SA        | ST       | SU    | 1-way sex |
| Sex | M               | 0.017     | 0.016    | 0.026 | 0.000311  |
|     | F               |           | 0.002    |       | 0.05      |
|     | 1-way sweetener | 0.015     | 0.000142 |       | 0.000602  |

|     |                 | Sweetener |    |    |           |
|-----|-----------------|-----------|----|----|-----------|
|     | Naringenine     | SA        | ST | SU | 1-way sex |
| Sex | M               |           |    |    |           |
|     | F               |           |    |    |           |
|     | 1-way sweetener |           |    |    |           |

|     |                 | Sweetener |           |    |           |
|-----|-----------------|-----------|-----------|----|-----------|
|     | NG              | SA        | ST        | SU | 1-way sex |
| Sex | M               | 0.032     | 0.000548  |    | 0.017     |
|     | F               | 0.015     | 0.013     |    | 0.03      |
|     | 1-way sweetener | 0.002     | 0.0000375 |    | 0.003     |

|     |                 | Sweetener |    |    |           |
|-----|-----------------|-----------|----|----|-----------|
|     | NGG             | SA        | ST | SU | 1-way sex |
| Sex | M               |           |    |    |           |
|     | F               |           |    |    |           |
|     | 1-way sweetener |           |    |    |           |

|     |                 | Sweetener |       |       |           |
|-----|-----------------|-----------|-------|-------|-----------|
|     | NS              | SA        | ST    | SU    | 1-way sex |
| Sex | M               | 0.021     |       | 0.048 |           |
|     | F               |           |       |       |           |
|     | 1-way sweetener |           | 0.049 |       |           |



|     |                    | Sweetener |           |    |           |
|-----|--------------------|-----------|-----------|----|-----------|
| Sex | TOTAL N            | SA        | ST        | SU | 1-way sex |
|     | M                  |           | 0.0004    |    | 0.033     |
|     | F                  | 0.014     | 0.027     |    | 0.036     |
|     | 1-way<br>sweetener | 0.003     | 0.0000682 |    | 0.004     |

Table S5. Distribution of values of metabolites concentrations from different families at different sampling times:

Caffeic Acid (CA), CA-G Glucuronide (CA-G), CA-Glucuronide-Sulfate (CA-GS), total amount of CA and its derivatives (Total CA), 3,4-Dihydroxyphenylacetic acid (DHPAA), DHPAA-Glucuronide (DHPAA-G), DHPAA-Glucuronide-Sulfate (DHPAA-GS), DHPAA-Di-Sulfate (DHPAA-SS), total amount of DHPAA and its derivatives (Total DHPAA), Trans Ferulic Acid- Glucuronide (TFA-G), Trans Ferulic Acid-Sulfate (TFA-S), total amount of TFA and its derivatives (Total TFA), Vanillic Acid (VA), VA-Di-Glucuronide (VA-GG) and VA-Di-Sulfate (VA-SS), VA-Glucuronide-Sulfate (VA-GS), total amount of VA and its derivatives (Total VA). Eriodictyol (E), E-Glucuronide (EG), E-Sulfate (ES), total amount of E and its derivatives (Total E), Homoe-riodictyol (HE), HE-Glucuronide (HE-G), HE-Di-Glucuronide (HE-GG), total amount of HE and its derivatives (Total HE), Naringenin-Glucuronide (NG), Naringenin-Sulfate (NS), total amount of Naringenin (Total N)

| Metabolites from (poly)phenols at initial time (day 0) |             |            |            |            |            |            |            |
|--------------------------------------------------------|-------------|------------|------------|------------|------------|------------|------------|
| cluster                                                | metabolite  | min        | q1         | median     | mean       | q3         | max        |
| 1                                                      | CA          | 0.01061947 | 0.0159292  | 0.02123894 | 0.02729605 | 0.02558563 | 0.11504425 |
| 1                                                      | CA.G        | 0.06289129 | 0.0971827  | 0.098321   | 0.11011058 | 0.11895276 | 0.19578828 |
| 1                                                      | CA.GS       | 0.002      | 0.002      | 0.003      | 0.00392857 | 0.00475    | 0.009      |
| 1                                                      | Total.CA    | 0.359      | 0.39525    | 0.574      | 0.61192857 | 0.745      | 1.153      |
| 1                                                      | DHPAA       | 0.01268797 | 0.06578947 | 0.11083922 | 0.11740507 | 0.16952538 | 0.22368421 |
| 1                                                      | DHPAA.G     | 0.01019241 | 0.03292382 | 0.04938898 | 0.05371344 | 0.06292555 | 0.16209048 |
| 1                                                      | DHPAA.GS    | 0.02102497 | 0.05519054 | 0.13666229 | 0.18002628 | 0.29500657 | 0.42838371 |
| 1                                                      | DHPAA.SS    | 0.00714286 | 0.02787698 | 0.03869048 | 0.06380386 | 0.06210318 | 0.20436508 |
| 1                                                      | Total.DHPAA | 0.0186425  | 0.04488104 | 0.06495262 | 0.06866389 | 0.08141823 | 0.17813369 |
| 1                                                      | TFA.G       | 0.00239562 | 0.00504791 | 0.01163587 | 0.09137577 | 0.04218001 | 1          |
| 1                                                      | TFA.S       | 0          | 0.03881303 | 0.05454073 | 0.08584453 | 0.12875056 | 0.21764317 |
| 1                                                      | Total.TFA   | 0.00075734 | 0.03985221 | 0.0552965  | 0.08932339 | 0.13042714 | 0.21848121 |
| 1                                                      | VA          | 0.00241622 | 0.01045642 | 0.02003799 | 0.02969932 | 0.03736815 | 0.09216644 |
| 1                                                      | VA.GG       | 0.00247525 | 0.03929455 | 0.10334158 | 0.16796323 | 0.20792079 | 0.86138614 |
| 1                                                      | VA.GS       | 0.03070175 | 0.06123482 | 0.10307018 | 0.1996578  | 0.2462888  | 1          |
| 1                                                      | VA.SS       | 0          | 0.02967525 | 0.05655095 | 0.06224536 | 0.07316163 | 0.16759985 |
| 1                                                      | Total.VA    | 0.01403108 | 0.02684044 | 0.03935162 | 0.04483839 | 0.04796988 | 0.11183448 |
| 2                                                      | CA          | 0.0159292  | 0.02477876 | 0.04266667 | 0.22694041 | 0.05132743 | 1          |
| 2                                                      | CA.G        | 0.50540694 | 0.80961867 | 0.81331816 | 0.79658509 | 0.85458167 | 1          |
| 2                                                      | CA.GS       | 0.002      | 0.002      | 0.002      | 0.0038     | 0.005      | 0.008      |
| 2                                                      | Total.CA    | 1.81       | 2.88       | 3.018      | 2.9314     | 3.418      | 3.531      |
| 2                                                      | DHPAA       | 0.04981203 | 0.15413534 | 0.1799812  | 0.22302632 | 0.31907895 | 0.41212406 |
| 2                                                      | DHPAA.G     | 0.08283931 | 0.11479459 | 0.13065523 | 0.16525741 | 0.14708788 | 0.35091004 |
| 2                                                      | DHPAA.GS    | 0.03022339 | 0.04599212 | 0.0499343  | 0.08883049 | 0.05519054 | 0.26281209 |
| 2                                                      | DHPAA.SS    | 0.00595238 | 0.01309524 | 0.07738095 | 0.07015873 | 0.1        | 0.15436508 |
| 2                                                      | Total.DHPAA | 0.09661139 | 0.14081723 | 0.15063343 | 0.18635172 | 0.15784324 | 0.38585333 |
| 2                                                      | TFA.G       | 0.00308008 | 0.00787132 | 0.01060917 | 0.01444216 | 0.02258727 | 0.02806297 |
| 2                                                      | TFA.S       | 0.04708023 | 0.08145918 | 0.10998019 | 0.25093933 | 0.15633493 | 0.85984213 |

|   |             |            |            |            |            |            |            |
|---|-------------|------------|------------|------------|------------|------------|------------|
| 2 | Total.TFA   | 0.04837226 | 0.08303671 | 0.11083102 | 0.2518452  | 0.15698536 | 0.86000065 |
| 2 | VA          | 0.07636933 | 0.09966506 | 0.10548066 | 0.10397094 | 0.10628052 | 0.13205912 |
| 2 | VA.GG       | 0.03960396 | 0.06806931 | 0.17326733 | 0.22376238 | 0.37004951 | 0.46782178 |
| 2 | VA.GS       | 0.10053981 | 0.13529015 | 0.1437247  | 0.18466787 | 0.21626181 | 0.32752287 |
| 2 | VA.SS       | 0.01007839 | 0.02239642 | 0.02612915 | 0.03210153 | 0.02948862 | 0.07241508 |
| 2 | Total.VA    | 0.08978564 | 0.10890236 | 0.11551204 | 0.11424974 | 0.11879204 | 0.13825664 |
| 3 | CA          | 0.00176991 | 0.01769912 | 0.02558563 | 0.03811782 | 0.04252507 | 0.17121565 |
| 3 | CA.G        | 0.00142288 | 0.01017359 | 0.01906659 | 0.02268901 | 0.03009391 | 0.06829824 |
| 3 | CA.GS       | 0.001      | 0.002      | 0.002      | 0.00279167 | 0.003      | 0.009      |
| 3 | Total.CA    | 0.024      | 0.089      | 0.1705     | 0.25839583 | 0.25975    | 1.917      |
| 3 | DHPAA       | 0.00234962 | 0.05321899 | 0.08952068 | 0.10789946 | 0.15695489 | 0.3087406  |
| 3 | DHPAA.G     | 0.00228809 | 0.0224454  | 0.04144566 | 0.04689963 | 0.05805036 | 0.14126365 |
| 3 | DHPAA.GS    | 0          | 0.04862024 | 0.14651774 | 0.16714623 | 0.20597898 | 1          |
| 3 | DHPAA.SS    | 0.02777778 | 0.05426587 | 0.0640873  | 0.07882838 | 0.08545054 | 0.26746032 |
| 3 | Total.DHPAA | 0.00937275 | 0.03549542 | 0.05112525 | 0.05990996 | 0.06866052 | 0.15431558 |
| 3 | TFA.G       | 0.00136893 | 0.00479124 | 0.00906913 | 0.01254005 | 0.01753936 | 0.04346338 |
| 3 | TFA.S       | 0.00123439 | 0.04170953 | 0.069099   | 0.11493152 | 0.11821219 | 0.55338755 |
| 3 | Total.TFA   | 0.00195826 | 0.04240823 | 0.06991853 | 0.11586777 | 0.11927804 | 0.55398198 |
| 3 | VA          | 0.00056656 | 0.00866091 | 0.02033794 | 0.02317457 | 0.03062355 | 0.06487144 |
| 3 | VA.GG       | 0.01113861 | 0.10232769 | 0.17079208 | 0.22891391 | 0.29641089 | 1          |
| 3 | VA.GS       | 0.04183536 | 0.10011808 | 0.17847503 | 0.2171982  | 0.31595817 | 0.75809717 |
| 3 | VA.SS       | 0.00335946 | 0.03331467 | 0.05617768 | 0.0707488  | 0.09257186 | 0.33370661 |
| 3 | Total.VA    | 0.00723917 | 0.02585479 | 0.03767021 | 0.03979441 | 0.05195391 | 0.08930524 |
| 4 | CA          | 0.00353982 | 0.01061947 | 0.01946903 | 0.02740215 | 0.02743363 | 0.17168142 |
| 4 | CA.G        | 0.0011383  | 0.00839499 | 0.01394422 | 0.01887467 | 0.02675014 | 0.07199772 |
| 4 | CA.GS       | 0.001      | 0.002      | 0.002      | 0.00253488 | 0.003      | 0.008      |
| 4 | Total.CA    | 0.018      | 0.086      | 0.168      | 0.22472093 | 0.2995     | 0.959      |
| 4 | DHPAA       | 0.00422932 | 0.06817525 | 0.10526316 | 0.10403205 | 0.12429511 | 0.33646617 |
| 4 | DHPAA.G     | 0.00189808 | 0.00963339 | 0.02561102 | 0.03040731 | 0.03776651 | 0.11583463 |
| 4 | DHPAA.GS    | 0.00788436 | 0.06633149 | 0.10512484 | 0.14664509 | 0.18593955 | 0.64914586 |
| 4 | DHPAA.SS    | 0.00396825 | 0.00833333 | 0.01984127 | 0.02040648 | 0.02797619 | 0.0468254  |
| 4 | Total.DHPAA | 0.00576784 | 0.02146205 | 0.03375734 | 0.04001262 | 0.04977341 | 0.13214543 |
| 4 | TFA.G       | 0          | 0.00410678 | 0.00821355 | 0.01491347 | 0.01591376 | 0.08829569 |
| 4 | TFA.S       | 0.0017     | 0.01747101 | 0.06664645 | 0.1107253  | 0.1692311  | 0.57153531 |
| 4 | Total.TFA   | 0.00238021 | 0.01823562 | 0.06733817 | 0.11174913 | 0.16992502 | 0.57237447 |
| 4 | VA          | 0.00098315 | 0.00649881 | 0.01308094 | 0.01566448 | 0.02028795 | 0.08321808 |
| 4 | VA.GG       | 0          | 0.05940594 | 0.09742955 | 0.1518077  | 0.18502475 | 0.52952617 |
| 4 | VA.GS       | 0.0111336  | 0.06747638 | 0.11707153 | 0.13367713 | 0.17004049 | 0.40789474 |
| 4 | VA.SS       | 0          | 0.02090332 | 0.03538273 | 0.04497653 | 0.0628966  | 0.21836506 |
| 4 | Total.VA    | 0.00536726 | 0.01456118 | 0.01986217 | 0.02472707 | 0.03014942 | 0.09687573 |
| 5 | CA          | 0.00884956 | 0.01967074 | 0.03274336 | 0.055903   | 0.05309735 | 0.17168142 |
| 5 | CA.G        | 0.00085373 | 0.00796813 | 0.02518497 | 0.04925197 | 0.08992601 | 0.16932271 |
| 5 | CA.GS       | 0.001      | 0.002      | 0.002      | 0.00321429 | 0.00475    | 0.007      |
| 5 | Total.CA    | 0.028      | 0.11025    | 0.208      | 0.23528571 | 0.36075    | 0.698      |
| 5 | DHPAA       | 0.03007519 | 0.05944549 | 0.10361842 | 0.17852947 | 0.22450658 | 0.6306391  |

|   |             |            |            |            |            |            |            |
|---|-------------|------------|------------|------------|------------|------------|------------|
| 5 | DHPAA.G     | 0.03278731 | 0.09214119 | 0.13454768 | 0.17092417 | 0.23575143 | 0.39121165 |
| 5 | DHPAA.GS    | 0.02233903 | 0.05617608 | 0.18856767 | 0.21834858 | 0.30124836 | 0.77923785 |
| 5 | DHPAA.SS    | 0.01944444 | 0.03720238 | 0.05238095 | 0.06726757 | 0.06321429 | 0.24920635 |
| 5 | Total.DHPAA | 0          | 0.088127   | 0.13416675 | 0.1776886  | 0.25198913 | 0.42867443 |
| 5 | TFA.G       | 0.00136893 | 0.00530459 | 0.00992471 | 0.02094945 | 0.02600958 | 0.091718   |
| 5 | TFA.S       | 0.03603565 | 0.05215315 | 0.18621485 | 0.30152319 | 0.41086104 | 0.93770641 |
| 5 | Total.TFA   | 0.03703383 | 0.0530326  | 0.1872302  | 0.30258515 | 0.41247877 | 0.93879627 |
| 5 | VA          | 0.0869174  | 0.11811168 | 0.14169069 | 0.15961836 | 0.16907317 | 0.33023946 |
| 5 | VA.GG       | 0.01237624 | 0.02011139 | 0.18069307 | 0.16354314 | 0.26732673 | 0.39480198 |
| 5 | VA.GS       | 0.07388664 | 0.10686572 | 0.18252362 | 0.2375972  | 0.32752287 | 0.67678812 |
| 5 | VA.SS       | 0.00970511 | 0.03107503 | 0.06281718 | 0.06911291 | 0.08967899 | 0.21127286 |
| 5 | Total.VA    | 0.11431932 | 0.13164695 | 0.15215519 | 0.17238772 | 0.18400673 | 0.33772322 |
| 6 | CA          | 0.08849558 | 0.08849558 | 0.08849558 | 0.08849558 | 0.08849558 | 0.08849558 |
| 6 | CA.G        | 0.17842914 | 0.17842914 | 0.17842914 | 0.17842914 | 0.17842914 | 0.17842914 |
| 6 | CA.GS       | 0.009      | 0.009      | 0.009      | 0.009      | 0.009      | 0.009      |
| 6 | Total.CA    | 0.678      | 0.678      | 0.678      | 0.678      | 0.678      | 0.678      |
| 6 | DHPAA       | 0.06907895 | 0.06907895 | 0.06907895 | 0.06907895 | 0.06907895 | 0.06907895 |
| 6 | DHPAA.G     | 0.15364015 | 0.15364015 | 0.15364015 | 0.15364015 | 0.15364015 | 0.15364015 |
| 6 | DHPAA.GS    | 0.44546649 | 0.44546649 | 0.44546649 | 0.44546649 | 0.44546649 | 0.44546649 |
| 6 | DHPAA.SS    | 1          | 1          | 1          | 1          | 1          | 1          |
| 6 | Total.DHPAA | 0.23084252 | 0.23084252 | 0.23084252 | 0.23084252 | 0.23084252 | 0.23084252 |
| 6 | TFA.G       | 0.04483231 | 0.04483231 | 0.04483231 | 0.04483231 | 0.04483231 | 0.04483231 |
| 6 | TFA.S       | 0.32029279 | 0.32029279 | 0.32029279 | 0.32029279 | 0.32029279 | 0.32029279 |
| 6 | Total.TFA   | 0.32206342 | 0.32206342 | 0.32206342 | 0.32206342 | 0.32206342 | 0.32206342 |
| 6 | VA          | 0.03522688 | 0.03522688 | 0.03522688 | 0.03522688 | 0.03522688 | 0.03522688 |
| 6 | VA.GG       | 0.54579208 | 0.54579208 | 0.54579208 | 0.54579208 | 0.54579208 | 0.54579208 |
| 6 | VA.GS       | 0.70006748 | 0.70006748 | 0.70006748 | 0.70006748 | 0.70006748 | 0.70006748 |
| 6 | VA.SS       | 1          | 1          | 1          | 1          | 1          | 1          |
| 6 | Total.VA    | 0.12177385 | 0.12177385 | 0.12177385 | 0.12177385 | 0.12177385 | 0.12177385 |

| Metabolites from (poly)phenols at final time (day 60) |             |            |            |            |            |            |            |
|-------------------------------------------------------|-------------|------------|------------|------------|------------|------------|------------|
| clusters                                              | metabolite  | min        | q1         | median     | mean       | q3         | max        |
| 1                                                     | CA          | 0.00353982 | 0.01106195 | 0.02606715 | 0.04502763 | 0.04469027 | 0.2460177  |
| 1                                                     | CA.G        | 0.0130905  | 0.04894707 | 0.07882755 | 0.08577777 | 0.11354582 | 0.18412066 |
| 1                                                     | CA.GS       | 0.002      | 0.003      | 0.005      | 0.00523077 | 0.006      | 0.015      |
| 1                                                     | Total.CA    | 0.505      | 0.558      | 0.6015     | 0.61342308 | 0.682      | 0.803      |
| 1                                                     | DHPAA       | 0          | 0.04452538 | 0.11513158 | 0.13253687 | 0.16459117 | 0.53524436 |
| 1                                                     | DHPAA.G     | 0.00449818 | 0.03855304 | 0.06842174 | 0.09071463 | 0.11284451 | 0.28780551 |
| 1                                                     | DHPAA.GS    | 0.03547963 | 0.08571346 | 0.1478318  | 0.18916339 | 0.28975033 | 0.51642576 |
| 1                                                     | DHPAA.SS    | 0.0031746  | 0.02172619 | 0.03373016 | 0.04668133 | 0.06636905 | 0.13888889 |
| 1                                                     | Total.DHPAA | 0.01104645 | 0.05086131 | 0.08000309 | 0.10381724 | 0.1234486  | 0.29127614 |
| 1                                                     | TFA.G       | 0.00102669 | 0.00496236 | 0.01608487 | 0.02481177 | 0.03413758 | 0.09582478 |
| 1                                                     | TFA.S       | 0.01531082 | 0.04450857 | 0.09132351 | 0.15526289 | 0.16017076 | 1          |
| 1                                                     | Total.TFA   | 0.00113601 | 0.04604075 | 0.09269277 | 0.15543157 | 0.16109663 | 1          |

|   |             |            |            |            |            |            |            |
|---|-------------|------------|------------|------------|------------|------------|------------|
| 1 | VA          | 0.00499908 | 0.02104357 | 0.02986952 | 0.07689897 | 0.09292047 | 0.47581277 |
| 1 | VA.GG       | 0.01237624 | 0.08469155 | 0.1595222  | 0.18999452 | 0.2237005  | 0.75371287 |
| 1 | VA.GS       | 0.03778678 | 0.08383941 | 0.1548583  | 0.17667505 | 0.22494939 | 0.55904184 |
| 1 | VA.SS       | 0.00223964 | 0.02743561 | 0.03579513 | 0.04859958 | 0.07190878 | 0.14483016 |
| 1 | Total.VA    | 0.00757049 | 0.02664994 | 0.05010271 | 0.08855915 | 0.10465742 | 0.50031475 |
| 2 | CA          | 0.01946903 | 0.03185841 | 0.04070797 | 0.07869299 | 0.05132743 | 0.32566372 |
| 2 | CA.G        | 0.01109846 | 0.05549232 | 0.11582243 | 0.11227617 | 0.1445646  | 0.24957314 |
| 2 | CA.GS       | 0.002      | 0.004      | 0.006      | 0.00630769 | 0.007      | 0.012      |
| 2 | Total.CA    | 0.715      | 0.801      | 0.904      | 0.90776923 | 0.981      | 1.123      |
| 2 | DHPAA       | 0.05545113 | 0.17246241 | 0.31907895 | 0.32967033 | 0.39473684 | 1          |
| 2 | DHPAA.G     | 0.00356214 | 0.04425377 | 0.11391056 | 0.11723469 | 0.19451378 | 0.30426417 |
| 2 | DHPAA.GS    | 0.01182654 | 0.11316379 | 0.2325887  | 0.25558959 | 0.33508541 | 0.70302234 |
| 2 | DHPAA.SS    | 0.02460318 | 0.05396825 | 0.0844367  | 0.08026743 | 0.11190476 | 0.13452381 |
| 2 | Total.DHPAA | 0.00898651 | 0.06813266 | 0.13466886 | 0.14394654 | 0.21935833 | 0.36726233 |
| 2 | TFA.G       | 0.00308008 | 0.0065024  | 0.01471595 | 0.03051124 | 0.04175223 | 0.10061602 |
| 2 | TFA.S       | 0.00213312 | 0.11000184 | 0.18127186 | 0.19074721 | 0.25868136 | 0.37545072 |
| 2 | Total.TFA   | 0.0029969  | 0.11110149 | 0.18301615 | 0.19221157 | 0.25944238 | 0.37680815 |
| 2 | VA          | 0.00886504 | 0.03107764 | 0.05377348 | 0.0954748  | 0.0951159  | 0.55018247 |
| 2 | VA.GG       | 0.06435644 | 0.1595222  | 0.20668317 | 0.25953172 | 0.32425743 | 0.62376238 |
| 2 | VA.GS       | 0.08670715 | 0.13719709 | 0.30904184 | 0.27837393 | 0.38090418 | 0.451417   |
| 2 | VA.SS       | 0.00037327 | 0.04031355 | 0.06308324 | 0.07313291 | 0.09854423 | 0.21724524 |
| 2 | Total.VA    | 0.03188881 | 0.0421098  | 0.08269556 | 0.11446586 | 0.11711891 | 0.57734486 |
| 3 | CA          | 0.01769912 | 0.04469027 | 0.0539823  | 0.0619469  | 0.06769912 | 0.14690266 |
| 3 | CA.G        | 0.07968128 | 0.14591634 | 0.17401821 | 0.22748293 | 0.28564314 | 0.43881616 |
| 3 | CA.GS       | 0.002      | 0.0045     | 0.0065     | 0.00625    | 0.00725    | 0.012      |
| 3 | Total.CA    | 1.288      | 1.31525    | 1.6385     | 1.715125   | 2.0195     | 2.347      |
| 3 | DHPAA       | 0.03242481 | 0.17340226 | 0.22485902 | 0.25881109 | 0.28418703 | 0.61889098 |
| 3 | DHPAA.G     | 0.02332527 | 0.03114925 | 0.06540562 | 0.07676186 | 0.10462819 | 0.1599064  |
| 3 | DHPAA.GS    | 0.06742773 | 0.10640991 | 0.30486202 | 0.29471489 | 0.4609067  | 0.53876478 |
| 3 | DHPAA.SS    | 0.01825397 | 0.0468254  | 0.06531746 | 0.07972222 | 0.09365079 | 0.20634921 |
| 3 | Total.DHPAA | 0.01599032 | 0.04705685 | 0.08949171 | 0.09808232 | 0.13358739 | 0.19870739 |
| 3 | TFA.G       | 0.00376455 | 0.02027721 | 0.04004107 | 0.04538843 | 0.05039357 | 0.13826147 |
| 3 | TFA.S       | 0.02242483 | 0.10344277 | 0.16900371 | 0.21069294 | 0.26987212 | 0.57898498 |
| 3 | Total.TFA   | 0.023207   | 0.10773405 | 0.17044434 | 0.21265782 | 0.271622   | 0.58049963 |
| 3 | VA          | 0.00761527 | 0.01048141 | 0.03291063 | 0.04281715 | 0.0494576  | 0.14555665 |
| 3 | VA.GG       | 0.01113861 | 0.06497525 | 0.13242574 | 0.1634901  | 0.28929455 | 0.33267327 |
| 3 | VA.GS       | 0.11032389 | 0.17341431 | 0.20630904 | 0.245361   | 0.2817139  | 0.51551957 |
| 3 | VA.SS       | 0.02836879 | 0.056271   | 0.075028   | 0.08328667 | 0.11440836 | 0.13736469 |
| 3 | Total.VA    | 0.02244641 | 0.03839082 | 0.04481828 | 0.06063844 | 0.0637155  | 0.16891959 |
| 4 | CA          | 0.00530974 | 0.02876106 | 0.04159292 | 0.05205297 | 0.06061947 | 0.26548673 |
| 4 | CA.G        | 0.02902675 | 0.03756403 | 0.06061468 | 0.05939877 | 0.07100171 | 0.10244735 |
| 4 | CA.GS       | 0.002      | 0.003      | 0.003      | 0.00472727 | 0.005      | 0.013      |
| 4 | Total.CA    | 0.143      | 0.22425    | 0.2585     | 0.2635     | 0.30075    | 0.392      |

|   |             |            |            |            |            |            |            |
|---|-------------|------------|------------|------------|------------|------------|------------|
| 4 | DHPAA       | 0.11432427 | 0.19407895 | 0.22227444 | 0.25088891 | 0.29323308 | 0.59962406 |
| 4 | DHPAA.G     | 0.0099844  | 0.02518201 | 0.04222569 | 0.07036118 | 0.08195528 | 0.32943318 |
| 4 | DHPAA.GS    | 0.01445467 | 0.0413929  | 0.09067017 | 0.11830277 | 0.15045992 | 0.46780552 |
| 4 | DHPAA.SS    | 0.00674603 | 0.0139881  | 0.03353175 | 0.04525217 | 0.06607143 | 0.1515873  |
| 4 | Total.DHPAA | 0.0295602  | 0.04345195 | 0.06183696 | 0.08844652 | 0.10733598 | 0.35392419 |
| 4 | TFA.G       | 0.00034223 | 0.00727242 | 0.01454483 | 0.01695601 | 0.02036277 | 0.0687885  |
| 4 | TFA.S       | 0.00831592 | 0.05552879 | 0.11473369 | 0.12657658 | 0.17588221 | 0.31867942 |
| 4 | Total.TFA   | 0.00909888 | 0.05661373 | 0.11580781 | 0.12767392 | 0.17696286 | 0.31929373 |
| 4 | VA          | 0.00779857 | 0.01448068 | 0.02312909 | 0.03324921 | 0.03564347 | 0.12739331 |
| 4 | VA.GG       | 0.01361386 | 0.07394802 | 0.10705446 | 0.13890581 | 0.21967822 | 0.33267327 |
| 4 | VA.GS       | 0.03407557 | 0.05727058 | 0.09564777 | 0.09905226 | 0.12457827 | 0.22705803 |
| 4 | VA.SS       | 0.00447928 | 0.01465099 | 0.03691495 | 0.0424335  | 0.05963046 | 0.11048899 |
| 4 | Total.VA    | 0.010983   | 0.02179621 | 0.03267568 | 0.04159024 | 0.04608555 | 0.13174635 |
| 5 | CA          | 0          | 0.0159292  | 0.02300885 | 0.02505071 | 0.03185841 | 0.06371681 |
| 5 | CA.G        | 0.00369949 | 0.01166762 | 0.01792829 | 0.0201362  | 0.02390438 | 0.04610131 |
| 5 | CA.GS       | 0          | 0.002      | 0.003      | 0.00351724 | 0.005      | 0.011      |
| 5 | Total.CA    | 0.028      | 0.074      | 0.095      | 0.10744828 | 0.155      | 0.199      |
| 5 | DHPAA       | 0.01221805 | 0.04370301 | 0.11701128 | 0.1124801  | 0.13768797 | 0.29746241 |
| 5 | DHPAA.G     | 0.00447218 | 0.01406656 | 0.02659906 | 0.03486112 | 0.0473739  | 0.14968799 |
| 5 | DHPAA.GS    | 0.00131406 | 0.05256242 | 0.09843859 | 0.10943771 | 0.14980289 | 0.32720105 |
| 5 | DHPAA.SS    | 0.00634921 | 0.0218254  | 0.03358054 | 0.03956335 | 0.05390212 | 0.10476191 |
| 5 | Total.DHPAA | 0.00592234 | 0.02168092 | 0.03185189 | 0.04457293 | 0.0683644  | 0.16368833 |
| 5 | TFA.G       | 0.00136893 | 0.00342231 | 0.0065024  | 0.01026694 | 0.00924025 | 0.07871321 |
| 5 | TFA.S       | 0.00309681 | 0.0290624  | 0.08371141 | 0.09734874 | 0.1281496  | 0.31338451 |
| 5 | Total.TFA   | 0.00401389 | 0.02970929 | 0.08460548 | 0.09823496 | 0.12920187 | 0.31394909 |
| 5 | VA          | 0.00354935 | 0.01338088 | 0.0260119  | 0.03016171 | 0.04120911 | 0.08828382 |
| 5 | VA.GG       | 0.0049505  | 0.06064356 | 0.1299505  | 0.159664   | 0.18069307 | 0.61386139 |
| 5 | VA.GS       | 0          | 0.05533063 | 0.09483957 | 0.11633981 | 0.16329285 | 0.46255061 |
| 5 | VA.SS       | 0          | 0.01717059 | 0.02500933 | 0.03402138 | 0.03844718 | 0.0862262  |
| 5 | Total.VA    | 0.00685817 | 0.01933207 | 0.03866415 | 0.03925251 | 0.05017725 | 0.09531856 |
| 6 | CA          | 0.00176991 | 0.01061947 | 0.02831858 | 0.03074402 | 0.04690266 | 0.07433628 |
| 6 | CA.G        | 0          | 0.04681275 | 0.0734206  | 0.07234554 | 0.10515083 | 0.12464428 |
| 6 | CA.GS       | 0.001      | 0.002      | 0.003      | 0.00381482 | 0.0045     | 0.013      |
| 6 | Total.CA    | 0.227      | 0.295      | 0.359      | 0.35918519 | 0.419      | 0.467      |
| 6 | DHPAA       | 0.00704887 | 0.04182331 | 0.06672932 | 0.07875592 | 0.1050282  | 0.1912594  |
| 6 | DHPAA.G     | 0          | 0.02085283 | 0.04383775 | 0.11213575 | 0.1025351  | 1          |
| 6 | DHPAA.GS    | 0          | 0.06767411 | 0.12483574 | 0.12765854 | 0.18134034 | 0.31406045 |
| 6 | DHPAA.SS    | 0          | 0.02123016 | 0.04087302 | 0.04777518 | 0.06706349 | 0.13412698 |
| 6 | Total.DHPAA | 0.00733855 | 0.03165877 | 0.05798743 | 0.1218171  | 0.111237   | 1          |
| 6 | TFA.G       | 0.00136893 | 0.00633128 | 0.01060917 | 0.01231657 | 0.01694045 | 0.03353867 |
| 6 | TFA.S       | 0.00319427 | 0.05756716 | 0.10177255 | 0.14523742 | 0.15774799 | 0.90418286 |
| 6 | Total.TFA   | 0.00429519 | 0.05848273 | 0.10252194 | 0.14612618 | 0.1585325  | 0.90459704 |

|   |          |            |            |            |            |            |            |
|---|----------|------------|------------|------------|------------|------------|------------|
| 6 | VA       | 0          | 0.01308094 | 0.02902801 | 0.10989961 | 0.09773208 | 1          |
| 6 | VA.GG    | 0.02227723 | 0.06373762 | 0.14727723 | 0.15681151 | 0.24814356 | 0.33415842 |
| 6 | VA.GS    | 0.00910931 | 0.06039136 | 0.10188934 | 0.09790532 | 0.13124157 | 0.21738642 |
| 6 | VA.SS    | 0.00149309 | 0.0177305  | 0.03844718 | 0.04836761 | 0.06942889 | 0.13960433 |
| 6 | Total.VA | 0.01275553 | 0.02170096 | 0.03324719 | 0.11788277 | 0.10685651 | 1          |

| Metabolites from flavanones at final time (day 0) |            |            |            |            |            |            |            |
|---------------------------------------------------|------------|------------|------------|------------|------------|------------|------------|
| clusters                                          | metabolite | min        | q1         | median     | mean       | q3         | max        |
| 1                                                 | E          | 0.03185331 | 0.06410784 | 0.07379087 | 0.07164977 | 0.07968903 | 0.10493892 |
| 1                                                 | EG.1       | 0.00023815 | 0.00665197 | 0.01163218 | 0.03426453 | 0.05617246 | 0.12507592 |
| 1                                                 | E.S        | 0.00949046 | 0.03659694 | 0.07076207 | 0.0962471  | 0.14101243 | 0.29875401 |
| 1                                                 | Total.E    | 0.00049985 | 0.00693481 | 0.01213505 | 0.03464735 | 0.05650525 | 0.12557095 |
| 1                                                 | HE         | 0.40829694 | 0.51746725 | 0.56768559 | 0.56404658 | 0.62445415 | 0.72707424 |
| 1                                                 | HE.G       | 7.64E-05   | 0.00144651 | 0.00415939 | 0.01370098 | 0.00957451 | 0.07832969 |
| 1                                                 | HE.GG      | 0.51902174 | 0.63451087 | 0.7201087  | 0.69927536 | 0.76630435 | 0.84782609 |
| 1                                                 | Total.HE   | 0.00143636 | 0.00221439 | 0.00368883 | 0.01379703 | 0.00905886 | 0.08040349 |
| 1                                                 | N          | 0.00660918 | 0.02439383 | 0.04443571 | 0.06028579 | 0.07156787 | 0.20975789 |
| 1                                                 | N.G        | 0.00161611 | 0.01737543 | 0.02964691 | 0.03041721 | 0.04383871 | 0.06485884 |
| 1                                                 | N.GG       | 0.02700395 | 0.04695686 | 0.06350321 | 0.0623529  | 0.08036262 | 0.08815266 |
| 1                                                 | N.S        | 0.00525714 | 0.03956316 | 0.05147348 | 0.07995915 | 0.11969882 | 0.20628392 |
| 1                                                 | Total.N    | 0.0018915  | 0.02416857 | 0.03329587 | 0.03629987 | 0.04754089 | 0.07820571 |
| 2                                                 | E          | 0.07933638 | 0.1035268  | 0.11027731 | 0.11692862 | 0.12015144 | 0.17527815 |
| 2                                                 | EG.1       | 0.00237032 | 0.01077282 | 0.02438176 | 0.0334617  | 0.03007665 | 0.1118158  |
| 2                                                 | E.S        | 0.0214686  | 0.05402433 | 0.09728233 | 0.10753469 | 0.14987395 | 0.23046743 |
| 2                                                 | Total.E    | 0.00265949 | 0.01133677 | 0.02475549 | 0.03384174 | 0.03056836 | 0.11196015 |
| 2                                                 | HE         | 0.42358079 | 0.45796943 | 0.51855895 | 0.51965066 | 0.5720524  | 0.62227074 |
| 2                                                 | HE.G       | 0.00034935 | 0.00146561 | 0.00314956 | 0.0048589  | 0.00493996 | 0.02264192 |
| 2                                                 | HE.GG      | 0.50815217 | 0.56182065 | 0.64266304 | 0.64285714 | 0.71059783 | 0.78804348 |
| 2                                                 | Total.HE   | 0.00147989 | 0.00293529 | 0.00417306 | 0.00596618 | 0.0055931  | 0.02428753 |
| 2                                                 | N          | 0.00877355 | 0.01743958 | 0.02905271 | 0.0319244  | 0.03893384 | 0.10481191 |
| 2                                                 | N.G        | 0.00740891 | 0.01360318 | 0.01768627 | 0.03084686 | 0.02652474 | 0.15677259 |
| 2                                                 | N.GG       | 0.00670229 | 0.03178117 | 0.04173065 | 0.0404933  | 0.04458107 | 0.08603723 |
| 2                                                 | N.S        | 0.00953427 | 0.02972209 | 0.08012873 | 0.08142101 | 0.10383767 | 0.29544024 |
| 2                                                 | Total.N    | 0.0076276  | 0.01963545 | 0.02138641 | 0.03559069 | 0.0381229  | 0.15984223 |
| 3                                                 | E          | 0.00994174 | 0.02842812 | 0.0405096  | 0.04154344 | 0.05428927 | 0.07379087 |
| 3                                                 | EG.1       | 0.00020498 | 0.00511673 | 0.01447546 | 0.03468464 | 0.04573258 | 0.30044785 |
| 3                                                 | E.S        | 0          | 0.02784493 | 0.06383178 | 0.11636469 | 0.12112599 | 0.82772008 |
| 3                                                 | Total.E    | 0          | 0.00429155 | 0.01477983 | 0.03494273 | 0.04617992 | 0.30065525 |
| 3                                                 | HE         | 0.54148472 | 0.61517467 | 0.64956332 | 0.64693331 | 0.68176856 | 0.72925764 |
| 3                                                 | HE.G       | 0          | 0.00064138 | 0.00157205 | 0.00268338 | 0.0045524  | 0.0085262  |
| 3                                                 | HE.GG      | 0.66847826 | 0.77377717 | 0.81521739 | 0.81101779 | 0.84918478 | 0.95923913 |
| 3                                                 | Total.HE   | 0.00102286 | 0.00229328 | 0.00296521 | 0.00401305 | 0.00522857 | 0.01040273 |
| 3                                                 | N          | 0.00782171 | 0.01136616 | 0.01463965 | 0.02614351 | 0.02904509 | 0.13660726 |
| 3                                                 | N.G        | 0          | 0.00898335 | 0.01389817 | 0.0151426  | 0.01980461 | 0.03605911 |
| 3                                                 | N.GG       | 0.0015827  | 0.00558474 | 0.01090201 | 0.01370652 | 0.01680831 | 0.05423224 |
| 3                                                 | N.S        | 0.0086635  | 0.02632791 | 0.0314041  | 0.04463434 | 0.05580327 | 0.1819531  |
| 3                                                 | Total.N    | 0.00076408 | 0.00976314 | 0.01524625 | 0.01664234 | 0.02402947 | 0.03496149 |
| 4                                                 | E          | 0.14324762 | 0.18855046 | 0.21309713 | 0.21581892 | 0.24619507 | 0.28981953 |
| 4                                                 | EG.1       | 0.00117278 | 0.00433185 | 0.00850887 | 0.0341607  | 0.03426154 | 0.20720338 |
| 4                                                 | E.S        | 0.03484354 | 0.10124818 | 0.15270019 | 0.26909582 | 0.31948192 | 1          |



|   |          |            |            |            |            |            |            |
|---|----------|------------|------------|------------|------------|------------|------------|
| 4 | Total.E  | 0.00031657 | 0.00252109 | 0.00942125 | 0.03436257 | 0.03523843 | 0.2075722  |
| 4 | HE       | 0          | 0.11790393 | 0.2860262  | 0.31659389 | 0.44868996 | 0.77729258 |
| 4 | HE.G     | 0.00029476 | 0.00655022 | 0.008494   | 0.03828508 | 0.04297489 | 0.17025109 |
| 4 | HE.GG    | 0          | 0.14945652 | 0.36413044 | 0.42366601 | 0.61005435 | 0.98913044 |
| 4 | Total.HE | 0          | 0.00524489 | 0.00905342 | 0.03925753 | 0.04555545 | 0.17173201 |
| 4 | N        | 0          | 0.01712567 | 0.02513448 | 0.05206899 | 0.09159741 | 0.12588759 |
| 4 | N.G      | 0.00282033 | 0.0191195  | 0.04081126 | 0.04542257 | 0.06715041 | 0.1135512  |
| 4 | N.GG     | 0.00617136 | 0.02719003 | 0.09394701 | 0.10422884 | 0.14619662 | 0.32248665 |
| 4 | N.S      | 0.03446457 | 0.09452934 | 0.12206821 | 0.19142033 | 0.29562032 | 0.45602182 |
| 4 | Total.N  | 0.0099236  | 0.03287057 | 0.05429472 | 0.06094037 | 0.08276455 | 0.144725   |
| 5 | E        | 0.01522922 | 0.0404096  | 0.04930326 | 0.05051901 | 0.06087799 | 0.09841567 |
| 5 | EG.1     | 0.00031274 | 0.00647857 | 0.02065057 | 0.03652396 | 0.04364693 | 0.30851839 |
| 5 | E.S      | 0.00362933 | 0.09263199 | 0.13216988 | 0.16373989 | 0.19075565 | 0.7891188  |
| 5 | Total.E  | 0.0008329  | 0.00697091 | 0.0210943  | 0.0370282  | 0.04417755 | 0.31019278 |
| 5 | HE       | 0.4650655  | 0.58733625 | 0.61244542 | 0.61432557 | 0.65065502 | 0.70305677 |
| 5 | HE.G     | 0.00019651 | 0.00125    | 0.00228166 | 0.00432739 | 0.00437227 | 0.01899563 |
| 5 | HE.GG    | 0.67663044 | 0.75475544 | 0.80434783 | 0.79257246 | 0.83016304 | 1          |
| 5 | Total.HE | 0.00193691 | 0.00294889 | 0.0040044  | 0.0061405  | 0.00638745 | 0.02066399 |
| 5 | N        | 0.00785061 | 0.01358087 | 0.0273421  | 0.03937771 | 0.04435309 | 0.21903366 |
| 5 | N.G      | 0.00519165 | 0.03464655 | 0.04656045 | 0.05422551 | 0.06868642 | 0.14700562 |
| 5 | N.GG     | 0          | 0.00732282 | 0.01600122 | 0.01727934 | 0.02127008 | 0.04497412 |
| 5 | N.S      | 0          | 0.06405423 | 0.09314034 | 0.13339743 | 0.14377905 | 0.65652251 |
| 5 | Total.N  | 0.03042831 | 0.04212637 | 0.05572566 | 0.06136086 | 0.07094559 | 0.1436506  |
| 6 | E        | 0.05602583 | 0.06934961 | 0.09960156 | 0.15537848 | 0.18563044 | 0.36628498 |
| 6 | EG.1     | 0.00102671 | 0.00946545 | 0.0253616  | 0.04533957 | 0.06123572 | 0.12960835 |
| 6 | E.S      | 0.16227754 | 0.17285636 | 0.18436915 | 0.34050896 | 0.35202175 | 0.83101999 |
| 6 | Total.E  | 0.00288386 | 0.01035156 | 0.02572063 | 0.04610959 | 0.06147865 | 0.13011323 |
| 6 | HE       | 0.57860262 | 0.58351528 | 0.61026201 | 0.6239083  | 0.65065502 | 0.69650655 |
| 6 | HE.G     | 0.00232533 | 0.01670306 | 0.0468286  | 0.06948144 | 0.09960699 | 0.18194323 |
| 6 | HE.GG    | 0.69836957 | 0.74728261 | 0.79076087 | 0.77921196 | 0.82269022 | 0.83695652 |
| 6 | Total.HE | 0.00403704 | 0.01848225 | 0.0485261  | 0.07115692 | 0.10120078 | 0.18353845 |
| 6 | N        | 0.02021978 | 0.02500468 | 0.11116552 | 0.1167206  | 0.20288144 | 0.2243316  |
| 6 | N.G      | 0.22776496 | 0.29450844 | 0.32763671 | 0.30628782 | 0.3394161  | 0.3421129  |
| 6 | N.GG     | 0.00344432 | 0.06151329 | 0.08991079 | 0.08372506 | 0.11212256 | 0.15163434 |
| 6 | N.S      | 0.03506708 | 0.04497621 | 0.08567245 | 0.11705011 | 0.15774635 | 0.26178847 |
| 6 | Total.N  | 0.24595735 | 0.29017255 | 0.32074279 | 0.30623822 | 0.33680846 | 0.33750997 |

| Metabolites from flavanones at final time (day 60) |            |            |            |            |            |            |            |
|----------------------------------------------------|------------|------------|------------|------------|------------|------------|------------|
| clusters                                           | metabolite | min        | q1         | median     | mean       | q3         | max        |
| 1                                                  | E          | 0.03152955 | 0.06923265 | 0.09291303 | 0.09634079 | 0.12132176 | 0.22084675 |
| 1                                                  | EG.1       | 0.00023615 | 0.00653513 | 0.01564535 | 0.02979461 | 0.04154532 | 0.15414903 |
| 1                                                  | E.S        | 0.01615008 | 0.07075563 | 0.10242371 | 0.17247138 | 0.18332971 | 0.99474511 |
| 1                                                  | Total.E    | 0.00088097 | 0.0077469  | 0.01606927 | 0.03032881 | 0.04195927 | 0.15437689 |
| 1                                                  | HE         | 0.41921397 | 0.5720524  | 0.61790393 | 0.60116448 | 0.6430131  | 0.69432314 |
| 1                                                  | HE.G       | 0.00058952 | 0.00417031 | 0.00854804 | 0.03966359 | 0.05421943 | 0.18724891 |
| 1                                                  | HE.GG      | 0.65217391 | 0.74048913 | 0.77173913 | 0.77043076 | 0.80706522 | 0.9076087  |
| 1                                                  | Total.HE   | 0.00230688 | 0.00608277 | 0.01030479 | 0.04143639 | 0.05618124 | 0.18836984 |
| 1                                                  | N          | 0.008223   | 0.01101001 | 0.02904509 | 0.0380343  | 0.05224954 | 0.12482263 |
| 1                                                  | N.G        | 0.00471361 | 0.02472383 | 0.03276074 | 0.03269795 | 0.04352996 | 0.05132738 |
| 1                                                  | N.GG       | 0.00168236 | 0.00798121 | 0.01592931 | 0.02715301 | 0.03555663 | 0.10831688 |
| 1                                                  | N.S        | 0.00501246 | 0.03201113 | 0.05577103 | 0.07230573 | 0.08964869 | 0.35147313 |
| 1                                                  | Total.N    | 0.00834813 | 0.03080671 | 0.03442239 | 0.03579632 | 0.04561356 | 0.05601687 |
| 2                                                  | E          | 0.02851516 | 0.06811885 | 0.09467454 | 0.0975914  | 0.12065675 | 0.18659059 |
| 2                                                  | EG.1       | 0.00122072 | 0.01866242 | 0.02832252 | 0.04882404 | 0.05187557 | 0.29511692 |
| 2                                                  | E.S        | 0.04491294 | 0.0827006  | 0.20985946 | 0.23944767 | 0.28539639 | 0.84777932 |
| 2                                                  | Total.E    | 0.00186079 | 0.01916596 | 0.02868869 | 0.0494813  | 0.05265735 | 0.29530284 |
| 2                                                  | HE         | 0.19432314 | 0.52401747 | 0.57423581 | 0.56652967 | 0.62008734 | 0.78820961 |
| 2                                                  | HE.G       | 0.00227074 | 0.03783843 | 0.06437773 | 0.12496019 | 0.1639083  | 0.44478166 |
| 2                                                  | HE.GG      | 0.3451087  | 0.70652174 | 0.76358696 | 0.75255755 | 0.8451087  | 0.89402174 |
| 2                                                  | Total.HE   | 0.00390646 | 0.03968487 | 0.06630105 | 0.12660382 | 0.1651487  | 0.44616372 |
| 2                                                  | N          | 0.00945266 | 0.0201899  | 0.02989623 | 0.05472295 | 0.08796809 | 0.17487615 |
| 2                                                  | N.G        | 0.11948528 | 0.16169875 | 0.16638741 | 0.18290338 | 0.17558561 | 0.40880363 |
| 2                                                  | N.GG       | 0.00480627 | 0.0111476  | 0.01212095 | 0.0433313  | 0.05319248 | 0.20419165 |
| 2                                                  | N.S        | 0.0329222  | 0.06744802 | 0.08799076 | 0.14907981 | 0.11516776 | 1          |
| 2                                                  | Total.N    | 0.12328111 | 0.16794214 | 0.17184815 | 0.18721363 | 0.1830329  | 0.3929937  |
| 3                                                  | E          | 0          | 0.02424635 | 0.04161109 | 0.04648799 | 0.05858284 | 0.14085966 |
| 3                                                  | EG.1       | 0.00017546 | 0.00140932 | 0.0055164  | 0.01192185 | 0.01380514 | 0.08184267 |
| 3                                                  | E.S        | 0.00664627 | 0.04300715 | 0.07226067 | 0.08533723 | 0.10438079 | 0.26661449 |
| 3                                                  | Total.E    | 0.00069373 | 0.00181707 | 0.005818   | 0.01227776 | 0.01430316 | 0.08200741 |
| 3                                                  | HE         | 0.59388646 | 0.65829694 | 0.67030568 | 0.68405305 | 0.69759825 | 0.92576419 |
| 3                                                  | HE.G       | 0.00019651 | 0.00120633 | 0.00586245 | 0.02955362 | 0.01429585 | 0.31616812 |
| 3                                                  | HE.GG      | 0.74456522 | 0.82065217 | 0.83967391 | 0.84581321 | 0.86684783 | 0.95108696 |
| 3                                                  | Total.HE   | 0.00186074 | 0.00311211 | 0.00762794 | 0.03124807 | 0.01606655 | 0.31839302 |
| 3                                                  | N          | 0.01055637 | 0.01425365 | 0.02827345 | 0.03054577 | 0.03025231 | 0.16677051 |
| 3                                                  | N.G        | 0.00079294 | 0.01293389 | 0.01687598 | 0.01884086 | 0.02206386 | 0.04347762 |
| 3                                                  | N.GG       | 0.00087001 | 0.0033559  | 0.00810737 | 0.01432902 | 0.01680831 | 0.08921452 |
| 3                                                  | N.S        | 0.00508104 | 0.01610356 | 0.03008286 | 0.03673553 | 0.03873111 | 0.13910039 |
| 3                                                  | Total.N    | 0          | 0.01361025 | 0.02085941 | 0.01979035 | 0.02424724 | 0.04141946 |
| 4                                                  | E          | 0.01941372 | 0.03706328 | 0.04766828 | 0.05407654 | 0.06542331 | 0.12618382 |
| 4                                                  | EG.1       | 0.00168747 | 0.00707432 | 0.01387755 | 0.02496423 | 0.02745378 | 0.1768093  |
| 4                                                  | E.S        | 0.00292047 | 0.07448993 | 0.10927204 | 0.12715748 | 0.15339494 | 0.37230633 |

|   |          |            |            |            |            |            |            |
|---|----------|------------|------------|------------|------------|------------|------------|
| 4 | Total.E  | 0.0020772  | 0.00757002 | 0.01438854 | 0.02541269 | 0.02776059 | 0.17716407 |
| 4 | HE       | 0.55458515 | 0.63864629 | 0.66157205 | 0.67093957 | 0.69650655 | 0.95633188 |
| 4 | HE.G     | 0.0019869  | 0.00814411 | 0.01950873 | 0.04998274 | 0.04525655 | 0.30645197 |
| 4 | HE.GG    | 0.70923913 | 0.78125    | 0.82065217 | 0.81670757 | 0.8451087  | 0.9076087  |
| 4 | Total.HE | 0.00372148 | 0.00982056 | 0.02111013 | 0.0516956  | 0.04685579 | 0.30862142 |
| 4 | N        | 0.00752552 | 0.01630399 | 0.0310068  | 0.04535763 | 0.07157005 | 0.13449983 |
| 4 | N.G      | 0.04517414 | 0.06569905 | 0.08351424 | 0.08474622 | 0.10212401 | 0.15505073 |
| 4 | N.GG     | 0.00307105 | 0.00931141 | 0.01478584 | 0.01931164 | 0.02522569 | 0.06096543 |
| 4 | N.S      | 0.00638224 | 0.02829315 | 0.04868105 | 0.12520708 | 0.10733979 | 0.97268196 |
| 4 | Total.N  | 0.0494582  | 0.07106983 | 0.0909652  | 0.09029527 | 0.10536038 | 0.1524084  |
| 5 | E        | 0.06598684 | 0.12257458 | 0.15153174 | 0.14937896 | 0.1681504  | 0.30656355 |
| 5 | EG.1     | 0.00106715 | 0.02264384 | 0.03434419 | 0.11647148 | 0.07073274 | 1          |
| 5 | E.S      | 0.03234868 | 0.07308022 | 0.11540139 | 0.13951931 | 0.20704689 | 0.31404165 |
| 5 | Total.E  | 0.00169509 | 0.02300729 | 0.03481129 | 0.11694404 | 0.07154446 | 1          |
| 5 | HE       | 0.27292576 | 0.41866812 | 0.51200873 | 0.48066126 | 0.55895197 | 0.59825328 |
| 5 | HE.G     | 0.00228166 | 0.013125   | 0.01973799 | 0.02833749 | 0.0353357  | 0.11641921 |
| 5 | HE.GG    | 0.38586957 | 0.48165761 | 0.66983696 | 0.6265528  | 0.70516304 | 0.9375     |
| 5 | Total.HE | 0.00418938 | 0.015566   | 0.02165421 | 0.0301449  | 0.03706243 | 0.11790117 |
| 5 | N        | 0.00914713 | 0.01290143 | 0.02364753 | 0.02804621 | 0.04148361 | 0.06339522 |
| 5 | N.G      | 0.05154496 | 0.07730457 | 0.09292774 | 0.09613155 | 0.11745312 | 0.14374988 |
| 5 | N.GG     | 0.00347736 | 0.01100172 | 0.0266664  | 0.02442247 | 0.03323425 | 0.04814586 |
| 5 | N.S      | 0.00238126 | 0.02391862 | 0.06721857 | 0.10529721 | 0.14320787 | 0.29999453 |
| 5 | Total.N  | 0.06918812 | 0.08448018 | 0.09290699 | 0.09927653 | 0.11368455 | 0.15897985 |
| 6 | E        | 0.15591739 | 0.22295907 | 0.26749379 | 0.30010145 | 0.27616265 | 0.75402494 |
| 6 | EG.1     | 0          | 0.00439472 | 0.0102344  | 0.01702682 | 0.02566702 | 0.05901618 |
| 6 | E.S      | 0.08778376 | 0.17638263 | 0.21259397 | 0.22755122 | 0.28532394 | 0.40307785 |
| 6 | Total.E  | 0.00057287 | 0.00523849 | 0.01049252 | 0.01772655 | 0.02630058 | 0.06008867 |
| 6 | HE       | 0.39737991 | 0.5        | 0.57860262 | 0.58806405 | 0.60262009 | 1          |
| 6 | HE.G     | 0.00572052 | 0.07158297 | 0.15456332 | 0.15617419 | 0.25431223 | 0.33991266 |
| 6 | HE.GG    | 0.63043478 | 0.65217391 | 0.73913044 | 0.72252416 | 0.7798913  | 0.84782609 |
| 6 | Total.HE | 0.00739943 | 0.07308023 | 0.15581236 | 0.15783632 | 0.25563934 | 0.34118978 |
| 6 | N        | 0.01143531 | 0.04400879 | 0.06339522 | 0.16570333 | 0.08556011 | 1          |
| 6 | N.G      | 0.13276667 | 0.19826792 | 0.23780374 | 0.23786106 | 0.2728442  | 0.3166098  |
| 6 | N.GG     | 0.00494551 | 0.0324181  | 0.05282014 | 0.07897114 | 0.11354133 | 0.22102927 |
| 6 | N.S      | 0.03212548 | 0.07403908 | 0.13371496 | 0.14448898 | 0.1754823  | 0.31449541 |
| 6 | Total.N  | 0.14070772 | 0.21205078 | 0.24570341 | 0.24445176 | 0.27857136 | 0.31696706 |

Table S6. (Poly)phenol metabolites concentration values and more information about the volunteer 66, who was assigned a cluster by the clustering with no one else.

Caffeic Acid (CA), CA-G Glucuronide (CA-G), CA-Glucuronide-Sulfate (CA-GS), total amount of CA and its derivatives (Total CA), 3,4-Dihydroxyphenylacetic acid (DHPAA), DHPAA-Glucuronide (DHPAA-G), DHPAA-Glucuronide-Sulfate (DHPAA-GS), DHPAA-Di-Sulfate (DHPAA-SS), total amount of DHPAA and its derivatives (Total DHPAA), Trans Ferulic Acid- Glucuronide (TFA-G), Trans Ferulic Acid-Sulfate (TFA-S), total amount of TFA and its derivatives (Total TFA), Vanillic Acid (VA), VA-Di-Glucuronide (VA-GG) and VA-Di-Sulfate (VA-SS), VA-Glucuronide-Sulfate (VA-GS), total amount of VA and its derivatives (Total VA). Sucralose (SU)

| Time        | Initial          | Final       |
|-------------|------------------|-------------|
| CA          | 0.02477876       | 0.08495575  |
| CA-G        | 0.81331816       | 0.07968127  |
| CA-S        | 0                | 0.5513544   |
| CA-GS       | 0.002            | 0.007       |
| Total CA    | 2.88             | 1.31        |
| DHPAA       | 0.1541353        | 0.1804511   |
| DHPAA-G     | 0.08283931       | 0.08616745  |
| DHPAA-GG    | 0                | 0           |
| DHPAA-GS    | 0.03022339       | 0.47963206  |
| DHPAA-SS    | 0.07738095       | 0.20634921  |
| Total DHPAA | 0.09661139 NA NA | 0.11849830  |
| TFA-G       | 0.02258727       | 0.06091718  |
| TFA-S       | 0.04708022       | 0.04917003  |
| TFS-SS      | 0                | 0           |
| Total TFA   | 0.04837226       | 0.05167209  |
| TIFA-S      | 0                | 0.03748869  |
| VA          | 0.076369332      | 0.008281815 |
| VA-GG       | 0.3700495        | 0.3254950   |
| VA-GS       | 0.1437247        | 0.5155196   |
| VA-SS       | 0.02612915       | 0.10936917  |
| Total VA    | 0.08978564       | 0.04345161  |
| Cluster     | 6                | 4           |
| Sweetener   | SU               |             |
| Sex         | WOMAN            |             |

Figure S1. Zoom on CA-GS clusters analyses results

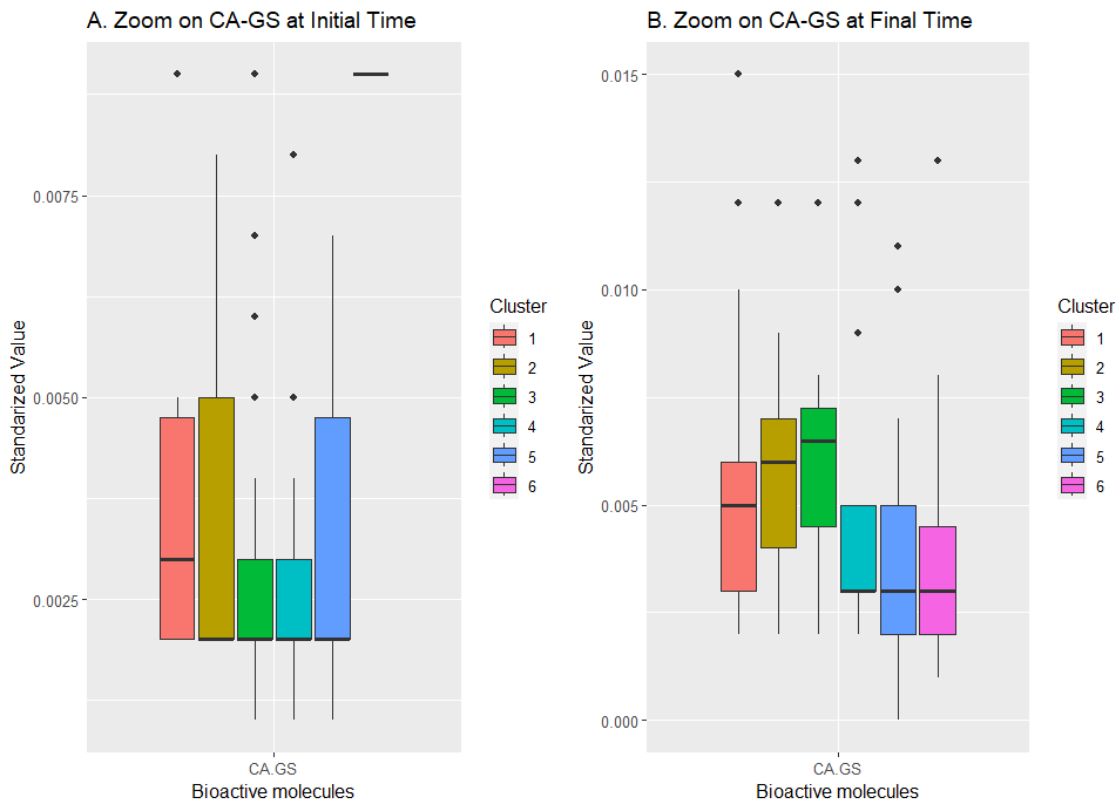

Caffeic acid-Glucuronide-Sulfate (CA-GS)
